# Supplementary material for: Construction of cellulose–phosphor hybrid hydrogels and their application for bioimaging
Source: Royal Society of Chemistry journal article supplement (doi:10.1039/c4tb01240b), 2014-09-16
Supplement: c4tb01240b1.pdf [file c4tb01240b1.pdf]

## Supporting information

# Construction of cellulose-phosphor hybrid hydrogels and their application for bioimaging

Zhenggang Wang<sup>a</sup>, Xiaoli Fan<sup>b</sup>, Meng He<sup>a</sup>, Zhiquan Chen<sup>b</sup>, Yanfeng Wang<sup>b</sup>, Qifa

Ye<sup>b</sup>, Hongjie Zhang<sup>c</sup>, Lina Zhang<sup>a\*</sup>

*<sup>a</sup>Department of Chemistry, Wuhan University, Wuhan, 430072, People's Republic  
of China*

*<sup>b</sup>Zhongnan Hospital of Wuhan University, Institute of Hepatobiliary Diseases of  
Wuhan University, Wuhan, 430071, People's Republic of China*

*<sup>c</sup>State Key Laboratory of Rare Earth Resource Utilization, Changchun Institute of  
Applied Chemistry, Chinese Academy of Sciences, Changchun, 130022, People's  
Republic of China*

\*Author for correspondence. E-mail: [zhangln@whu.edu.cn](mailto:zhangln@whu.edu.cn).

---

\* To whom correspondence should be addressed. Phone: +86-27-87219274.

Fax: +86-27-68762005. E-mail: [zhangln@whu.edu.cn](mailto:zhangln@whu.edu.cn) (L. Zhang).

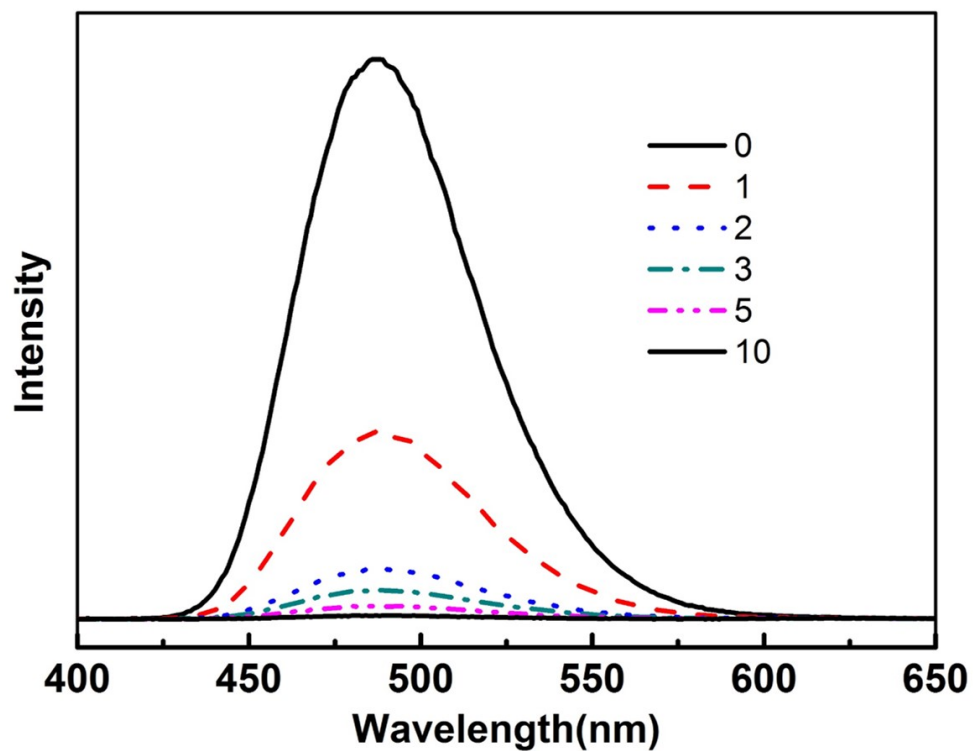

**Figure. S1** Fluorescent spectra of CPH5 0 min, 1 min, 3 min, 5 min and 30 min after excited. The samples were excited under a 365 nm UV lamp for 1 min before and test without a laser line for excitation.

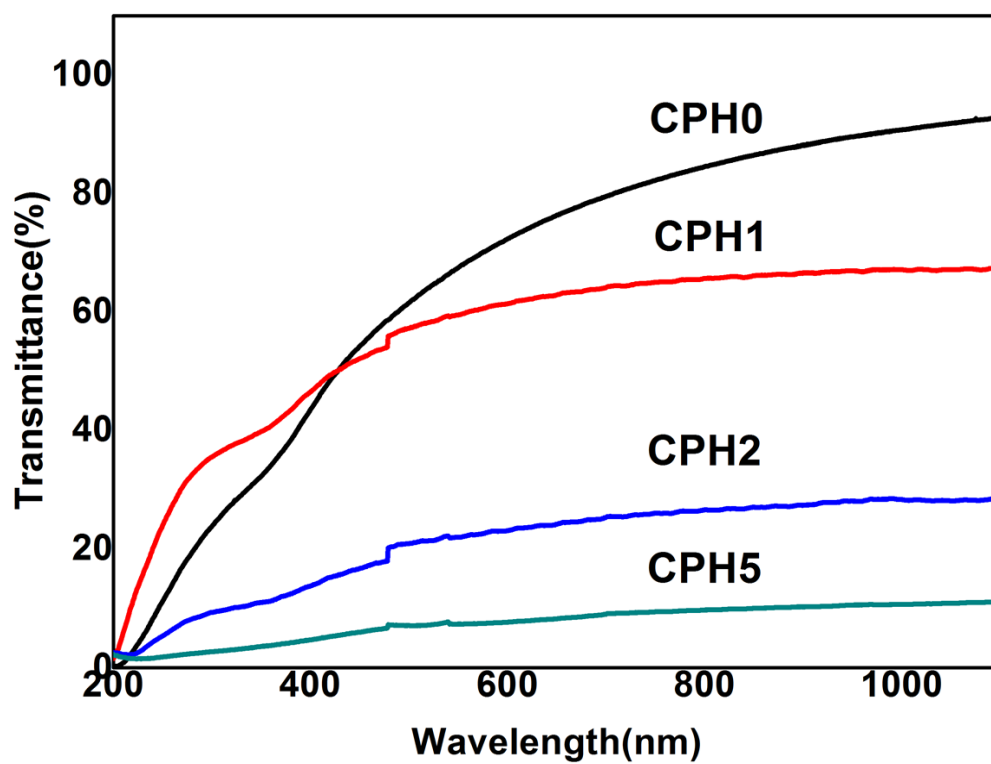

**Figure. S2** UV-vis spectra of the CPH0 CPH1, CPH2 and CPH5.

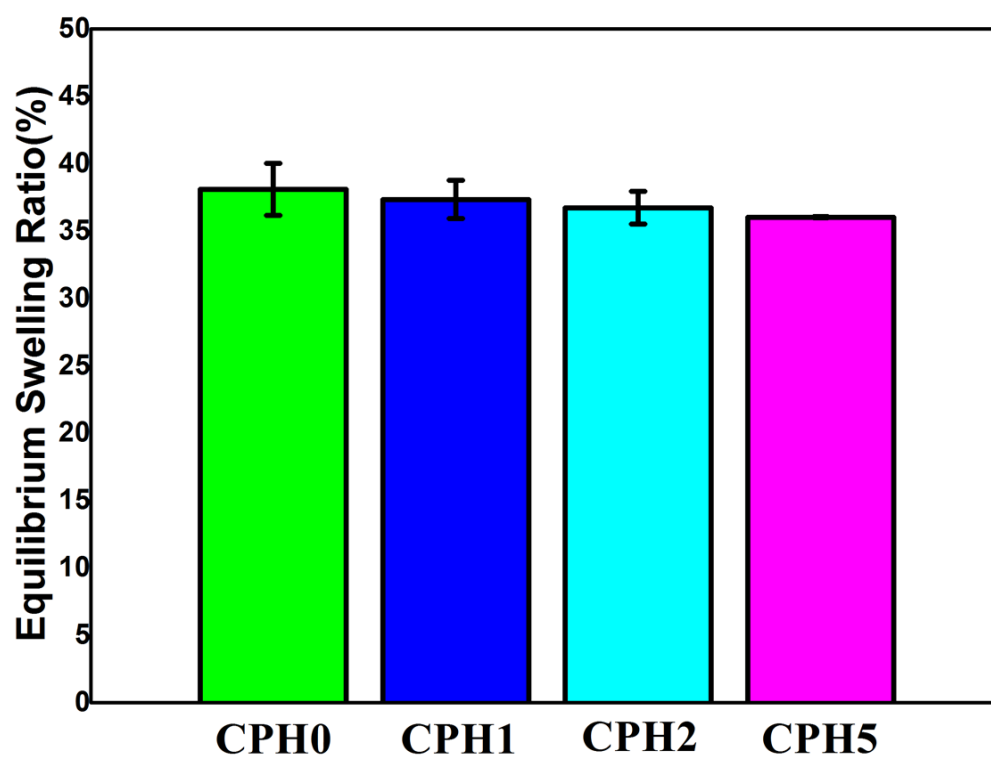

**Figure. S3** Equilibrium swelling ratio of the CPH after immersing in distilled water for a week, as a function of the composition of CPH at 25 °C.

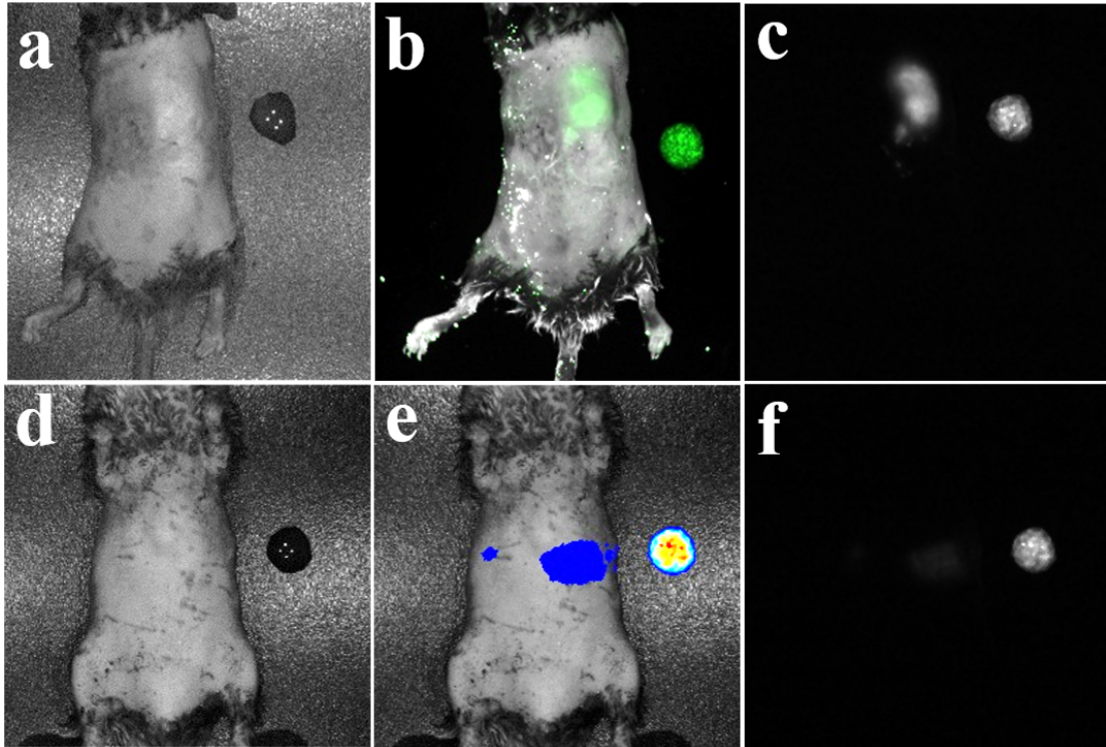

**Figure. S4** The images of a living nude mouse after injection of CPH5 under skin (a-c) and intragastric administrated (d-e): (a, d) images in bright-field; (b) fluorescent image under 455 nm excitation light; (c, f) images of autofluorescence without a excitation light; (e) merged image of the bright-field and the threshold false color of autofluorescence without a excitation light

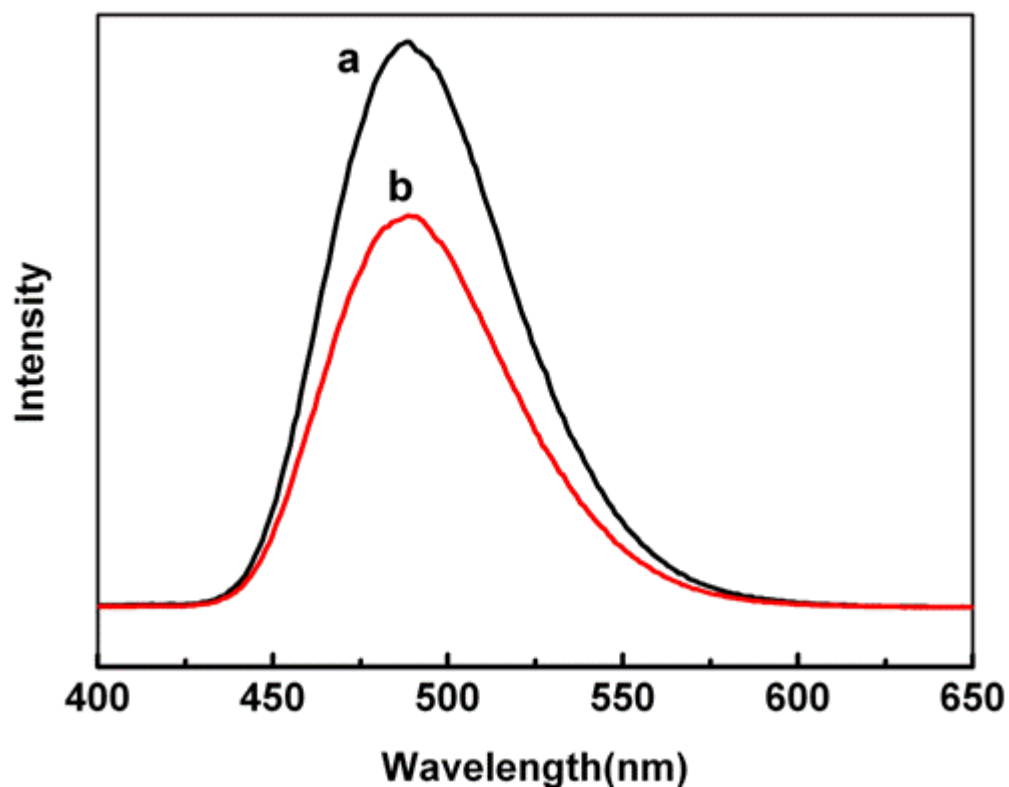

**Figure. S5** Fluorescent spectra of CPH5 in deionized water (a) and HCl aqueous solution with pH=2 (b). The samples were immersed in the solution for 24h respectively before test and excited under a 365 nm UV lamp for 1 min before and test without a laser line for excitation.

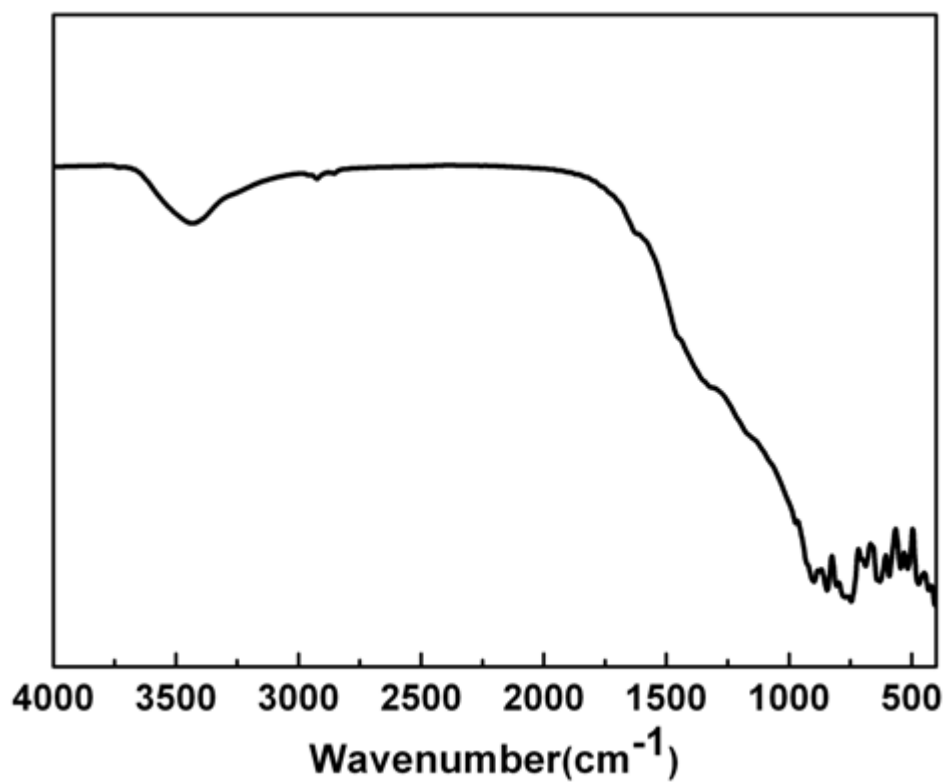

Figure. S6 FT-IR spectra of PP.

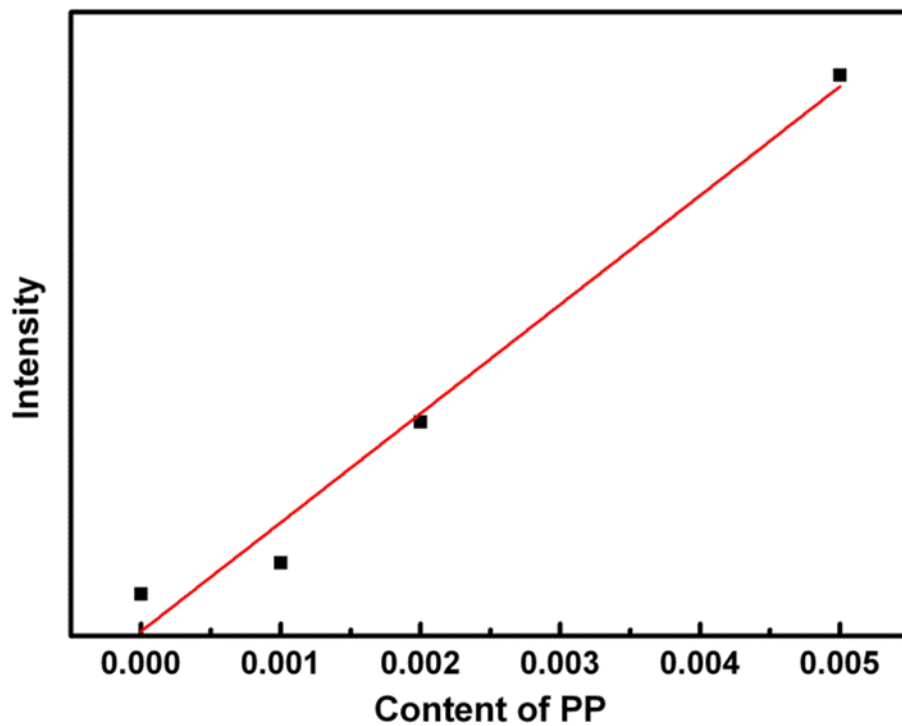

**Figure. S7** Intensity of fluorescence with different content of PP.
